# Supplementary material for: Dual Effect of Chemo-PDT with Tumor Targeting Nanoparticles Containing iRGD Peptide
Source: MDPI journal article supplement (doi:10.3390/pharmaceutics15020614), 2023-02-11
Supplement: s1 [file s1]

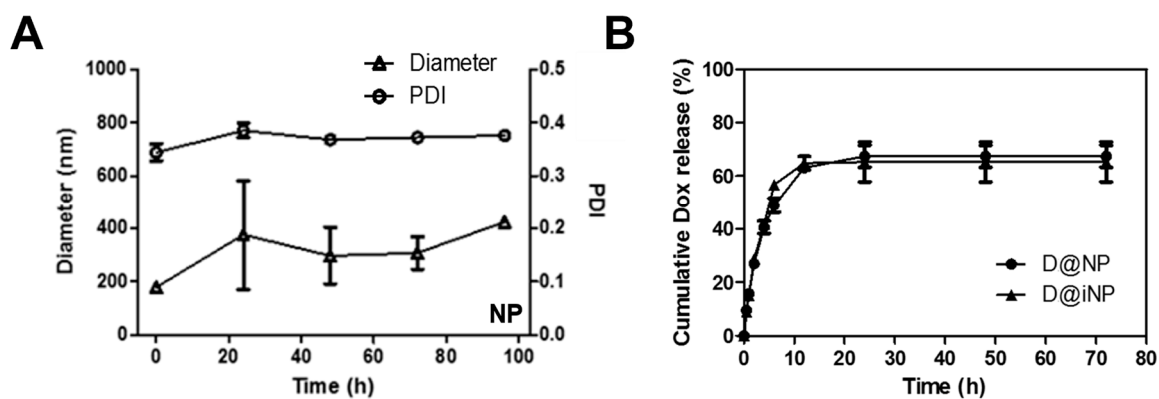

**Figure S1:** Characterization of nanoparticles. (A) Serum stability of NP for 96 h. (B) Dox release from D@NP and D@iNP in PBS at 37 °C.

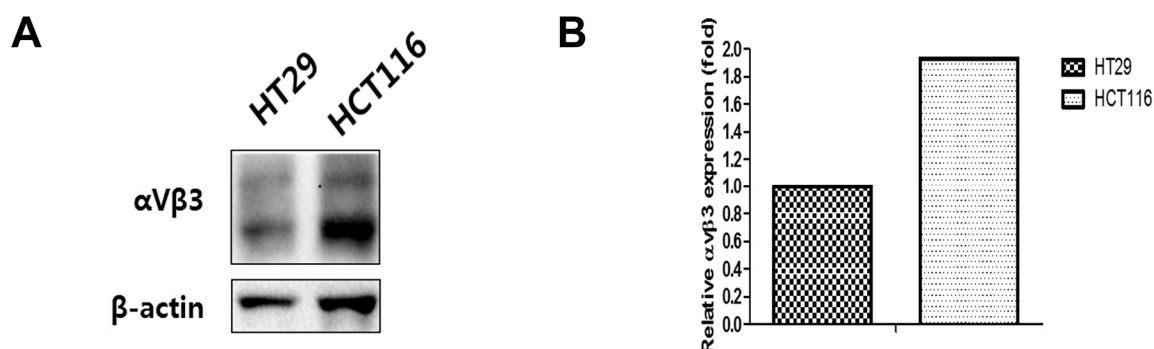

**Figure S2:** Detection of  $\alpha v\beta 3$  and cellular uptake in HT29 and HCT116. (A) Western blot of integrin  $\alpha v\beta 3$  in HT29 and HCT116. (B) Quantitative analysis of Western blot

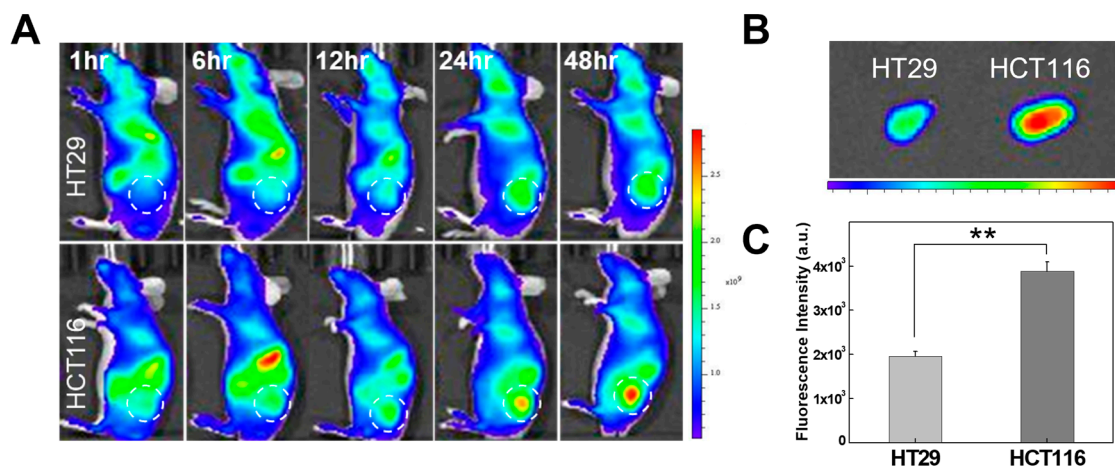

**Figure S3:** Biodistribution of D@iNP in HCT116 and HT29 tumor-bearing mice. Fluorescence signals were monitored in NIRF channel based on the intrinsic fluorescence of Ce6 in D@iNP. (A) Whole body fluorescence images of mice after intravenous injection of D@iNP. (B) Ex vivo NIRF imaging of the tumor extracted 48 h post injection of D@iNP. (C) NIRF intensities of tumor tissues in (B). \*\* indicates differences at the  $p < 0.01$  significance levels (analyzed using one-way ANOVA).
